# Supplementary material for: Phosphorus doped and defect modified graphitic carbon nitride for boosting photocatalytic hydrogen production
Source: Royal Society of Chemistry journal article supplement (doi:10.1039/d2cp04791h), 2022-11-28
Supplement: d2cp04791h1.pdf [file d2cp04791h1.pdf]

## Phosphorus doped and defect modified graphitic carbon nitride for boosting photocatalytic hydrogen production

Lu Chen<sup>a\*</sup>, Guiyang Yan<sup>a</sup>, Xiyao Liu<sup>a</sup>, Shaoming Ying<sup>a</sup>, Yuzhou Xia<sup>a</sup>, Shangbo Ning<sup>b\*</sup>, Xuxu Wang<sup>c\*\*</sup>

<sup>a</sup> Department of Chemistry, Fujian Province University Key Laboratory of Green Energy and Environment Catalysis, Ningde Normal University, Ningde 352100, PR China

<sup>b</sup> Hebei Key of Optic-electronic information and materials, the college of physics science and technology, Hebei University, Baoding, 071002, PR China

<sup>c</sup> State Key Laboratory of Photocatalysis on Energy and Environment, Fuzhou University, Fuzhou 350002, PR China

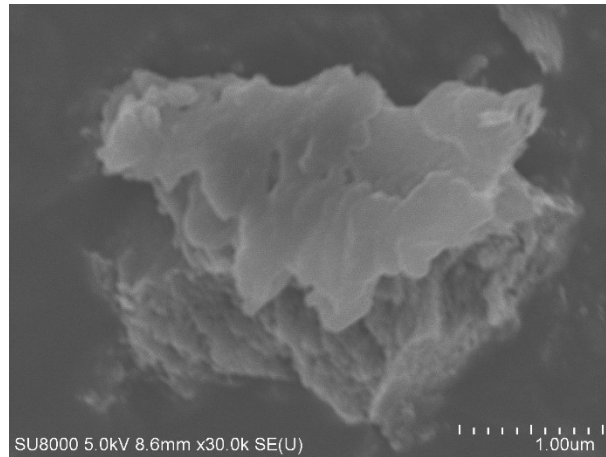

Fig. S1. SEM images of the as-prepared P-g-C<sub>3</sub>N<sub>4</sub> sample.

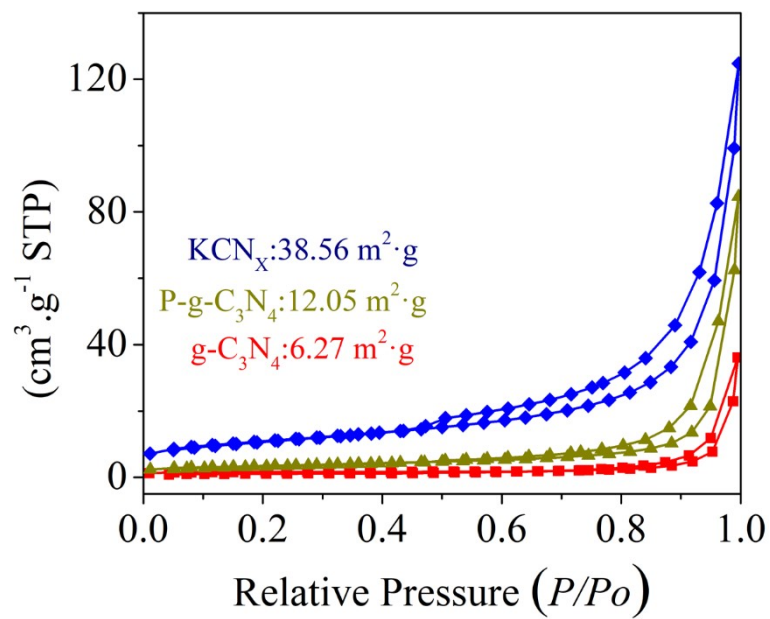

Fig S2: N<sub>2</sub> adsorption-desorption isotherms of pristine g-C<sub>3</sub>N<sub>4</sub>, P-g-C<sub>3</sub>N<sub>4</sub> and KCN<sub>x</sub> samples

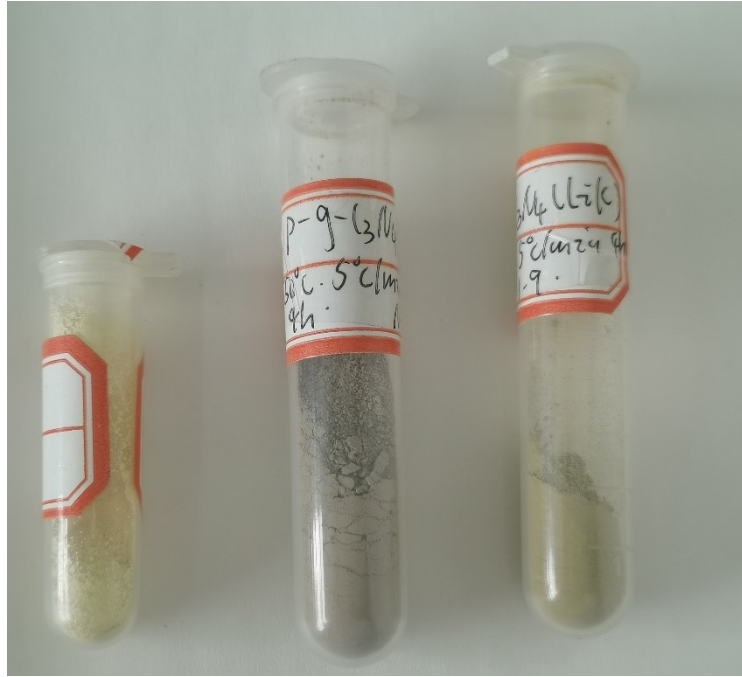

Fig. S3. Digital photographs of the as-prepared  $g\text{-C}_3\text{N}_4$  and  $\text{P-g-C}_3\text{N}_4$  and  $\text{PCN}_x$  samples
